# Supplementary material for: Amphiphilic core cross-linked star polymers as water-soluble, biocompatible and biodegradable unimolecular carriers for hydrophobic drugs
Source: Royal Society of Chemistry journal article supplement (doi:10.1039/c5py00655d), 2015-01-01
Supplement: c5py00655d1.pdf [file c5py00655d1.pdf]

# Supplementary Information

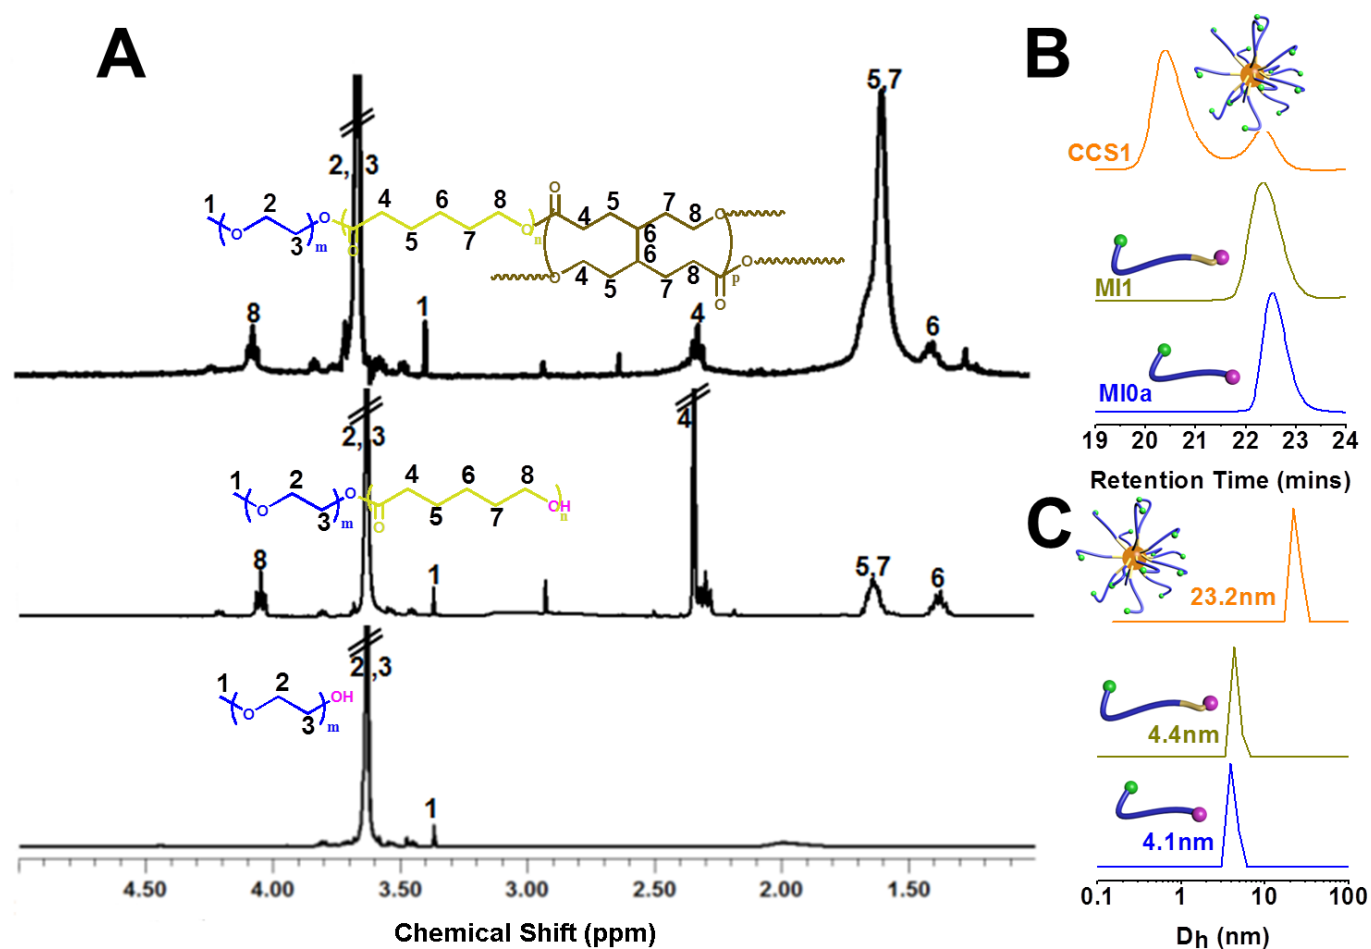

**Fig. S1** Characterizations of a typical PEG-PCL-BOD CCS polymer (MeO-PEG<sub>5k</sub>-PCL<sub>1k</sub>-BOD, CCS1; [MI]=5 mM, [MSA]/[MI] =3, [BOD]/[MI]=15), the MI (MeO-PEG<sub>5k</sub>-PCL<sub>1k</sub>; MI1) and initiator (MeO-PEG<sub>5k</sub>-OH) involved in the preparation: **(A)** <sup>1</sup>H NMR spectrum (in CDCl<sub>3</sub>) **(B)** THF GPC differential refractive index (DRI) chromatograms **(C)** DLS mass distribution in THF

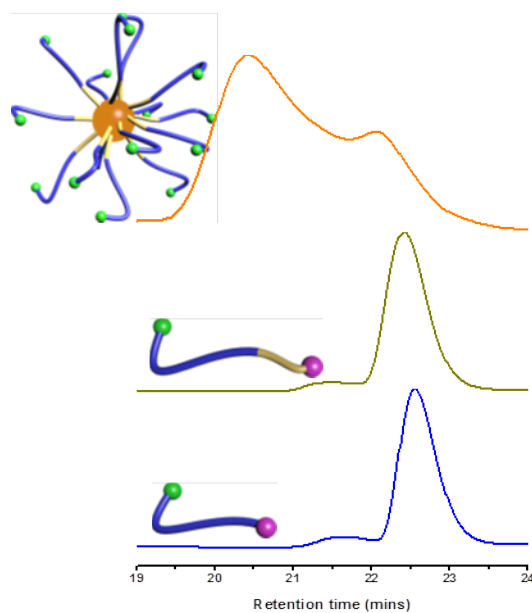

**Fig. S2** THF GPC differential refractive index (DRI) chromatograms of a functionalized CCS polymer (MAL-PEG<sub>5k</sub>-PCL<sub>3k</sub>-BOD), the MI (MAL-PEG<sub>5k</sub>-PCL<sub>3k</sub>) and initiator (MAL-PEG<sub>5k</sub>-OH) involved during the preparation

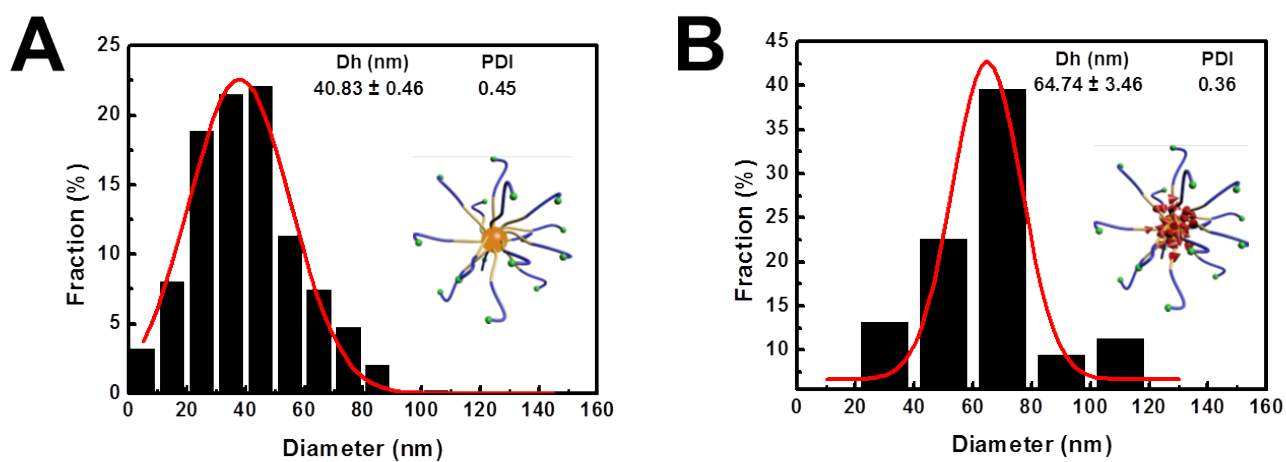

**Fig. S3** Particle size distribution of (A) CCS4 and (B) pirarubicin-loaded CCS4 measured by TEM

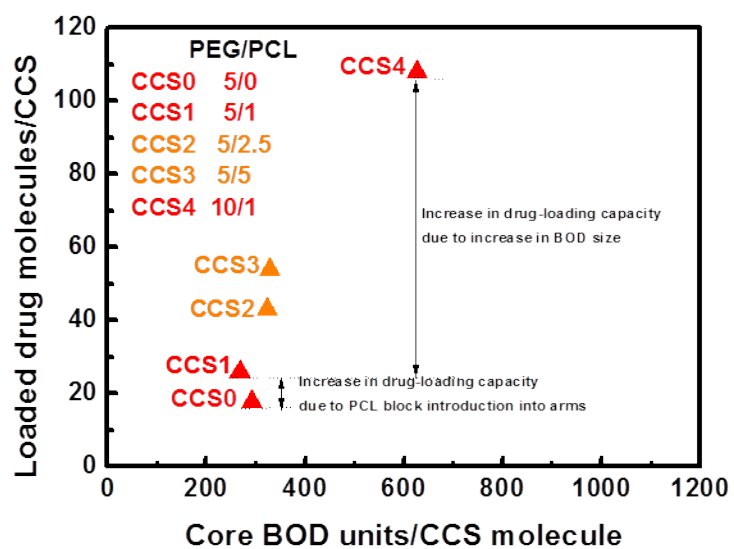

**Fig. S4** Pirarubicin loading capacity of MeO-PEG-PCL-BOD CCS polymers with change in BOD units
